# Supplementary material for: Self-supported Co 3 O 4 @Zn–CoNi 2 S 4 /NF core–shell nanoarrays as an efficient bifunctional electrode for overall water splitting
Source: Royal Society of Chemistry journal article supplement (doi:10.1039/d5ra09427e), 2026-01-01
Supplement: d5ra09427e1.pdf [file d5ra09427e1.pdf]

## Supporting Information

### Self-Supported $\text{Co}_3\text{O}_4@\text{Zn-CoNi}_2\text{S}_4/\text{NF}$ Core-Shell Nanoarrays as an Efficient Bifunctional Electrode for Overall Water Splitting

Xuan Zhao<sup>1</sup>, Yu Dong<sup>1</sup>, Zhijie Wang<sup>1</sup>, Yusheng Qiu<sup>1</sup>, Ende Wang<sup>2</sup>, Naikun Sun<sup>1</sup>\*, Yongli Tong<sup>1</sup>\*

### Supplementary Figures and Tables

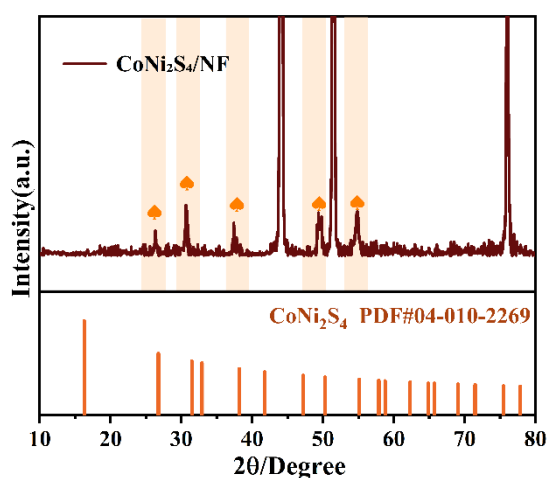

Fig S1. XRD pattern of the  $\text{CoNi}_2\text{S}_4/\text{NF}$ .

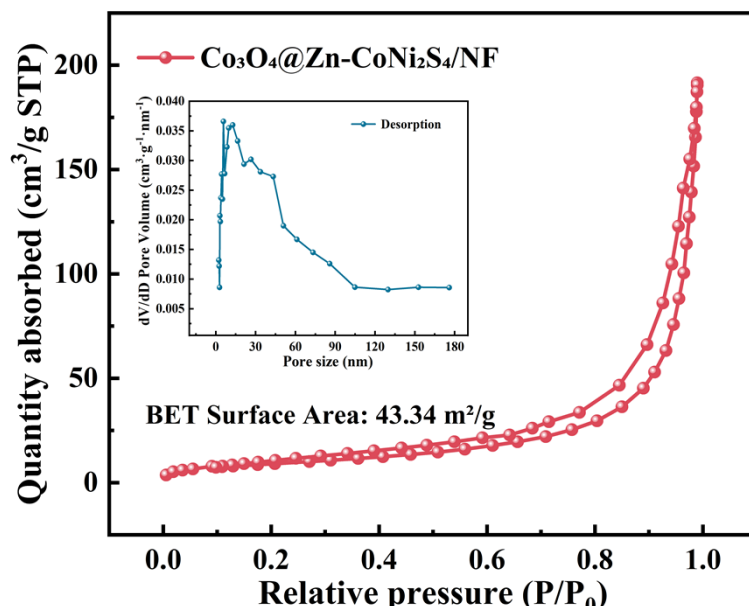

Fig.S2.  $\text{N}_2$  adsorption-desorption isotherms and pore size distribution of  $\text{Co}_3\text{O}_4@\text{Zn-CoNi}_2\text{S}_4/\text{NF}$ .

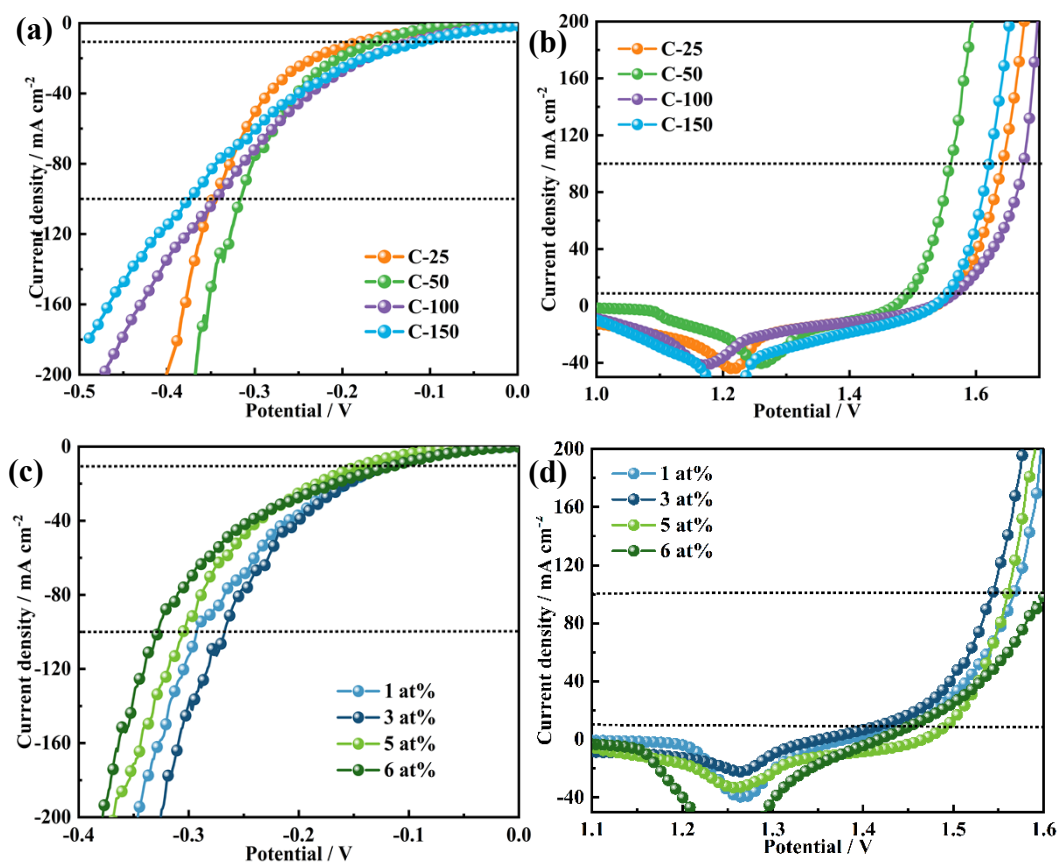

**Fig. S3** (a) HER and (b) OER LSV curves of the C-25, C-50, C-100, and C-150. (c) HER and (d) OER LSV curves with varying Zn doping contents.

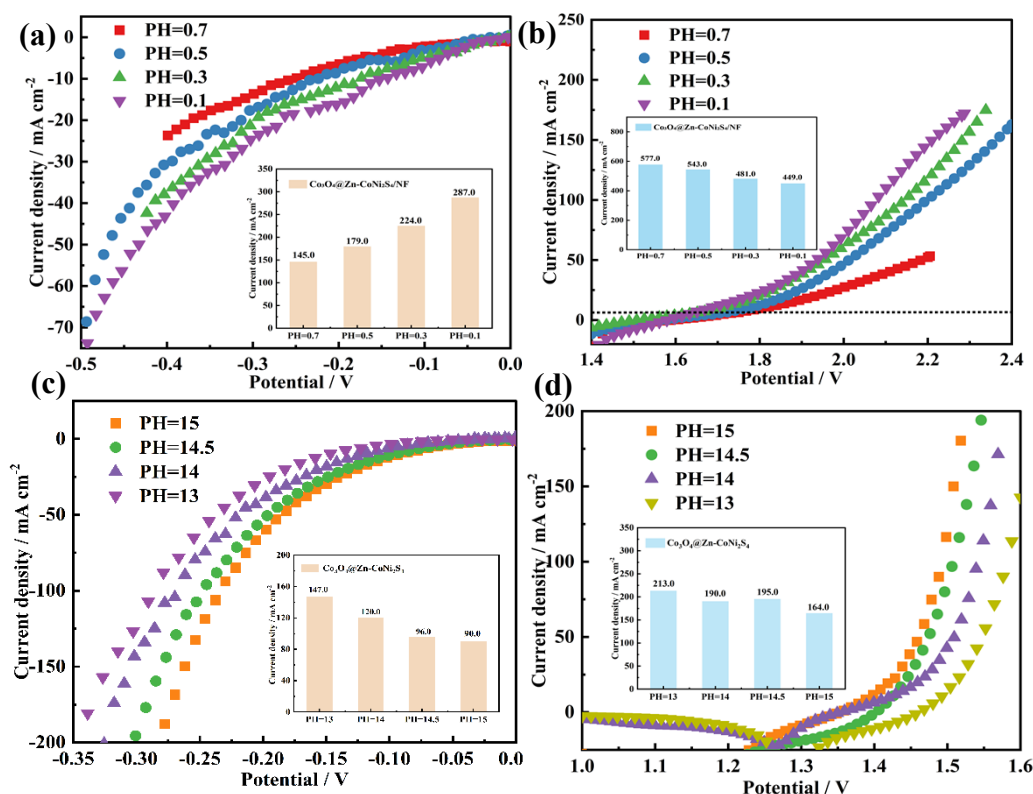

**Fig. S4.** LSV curves of  $\text{Co}_3\text{O}_4@\text{Zn-CoNi}_2\text{S}_4$  for (a) HER and (b) OER measured in  $\text{H}_2\text{SO}_4$  solutions (pH  $\approx$  0.7, 0.5, 0.3, and 0.0) ; (c) HER and (d) OER measured in KOH solutions (pH  $\approx$  13.0, 14.0, 14.5, and  $\sim$ 15.0).

In response to these comments, LSV measurements are conducted in both acidic and alkaline electrolytes to evaluate the catalytic activity of  $\text{Co}_3\text{O}_4@\text{Zn-CoNi}_2\text{S}_4$ . For the acidic tests, 0.1 M, 0.3 M, 0.5 M and 1.0 M  $\text{H}_2\text{SO}_4$  are employed, corresponding to a pH range of approximately 0.7–0.0. For the alkaline tests, 0.1 M, 1.0 M, 3.0 M and 5.0 M KOH are used, with a pH range of about 13.0–15.0.

Given that NF undergoes corrosion in acidic electrolytes,  $\text{Co}_3\text{O}_4@\text{Zn-CoNi}_2\text{S}_4$  powder is uniformly coated onto carbon cloth using a mixture of Nafion and ethanol as the binder. Electrochemical performance tests are then carried out under the same conditions as those described in the main text. The results demonstrate that the catalyst exhibits excellent catalytic activity in alkaline media, which is consistent with the main conclusions of this paper. However, its performance decreases significantly in acidic electrolytes, as illustrated in Fig. S4 (a–d) (page 3 of the Supporting Information).

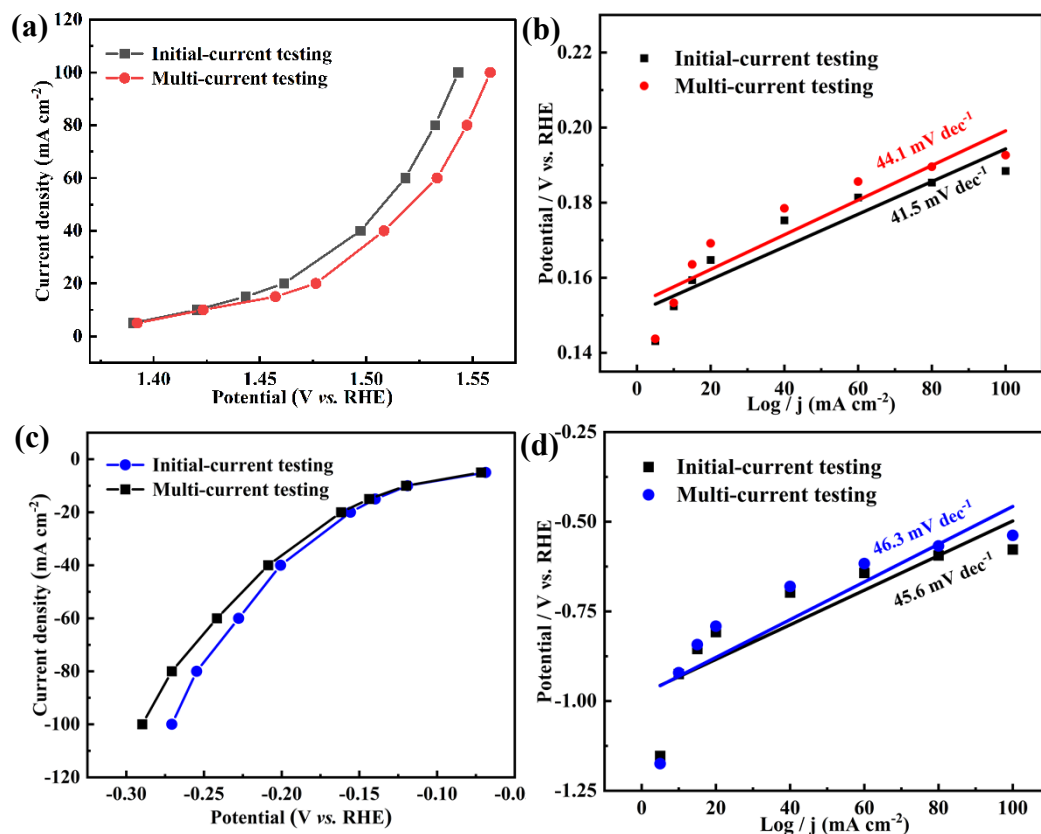

**Fig. S5.** Comparison of polarization curves and corresponding Tafel plots obtained from LSV and steady-state potentiostatic measurements for  $\text{Co}_3\text{O}_4@\text{Zn-CoNi}_2\text{S}_4/\text{NF}$ .

**Table 1** The OER overpotentials and standard deviations

| Sample                                                       | $\eta$ @ $10 \text{ mA cm}^{-2}$ (V) | Standard Deviation | Sample Size |
|--------------------------------------------------------------|--------------------------------------|--------------------|-------------|
| $\text{Co}_3\text{O}_4@\text{Zn-CoNi}_2\text{S}_4/\text{NF}$ | 195mV                                | $\pm 2.63$         | 3           |
| $\text{Co}_3\text{O}_4@\text{CoNi}_2\text{S}_4/\text{NF}$    | 265mV                                | $\pm 2.71$         | 3           |
| $\text{Co}_3\text{O}_4/\text{NF}$                            | 303mV                                | $\pm 2.94$         | 3           |

**Table 2** The HER overpotentials and standard deviations

| Sample                                                       | $\eta$ @ $10 \text{ mA cm}^{-2}$ (V) | Standard Deviation | Sample Size |
|--------------------------------------------------------------|--------------------------------------|--------------------|-------------|
| $\text{Co}_3\text{O}_4@\text{Zn-CoNi}_2\text{S}_4/\text{NF}$ | 120mV                                | $\pm 2.64$         | 3           |
| $\text{Co}_3\text{O}_4@\text{CoNi}_2\text{S}_4/\text{NF}$    | 160mV                                | $\pm 3.25$         | 3           |
| $\text{Co}_3\text{O}_4/\text{NF}$                            | 168mV                                | $\pm 2.29$         | 3           |

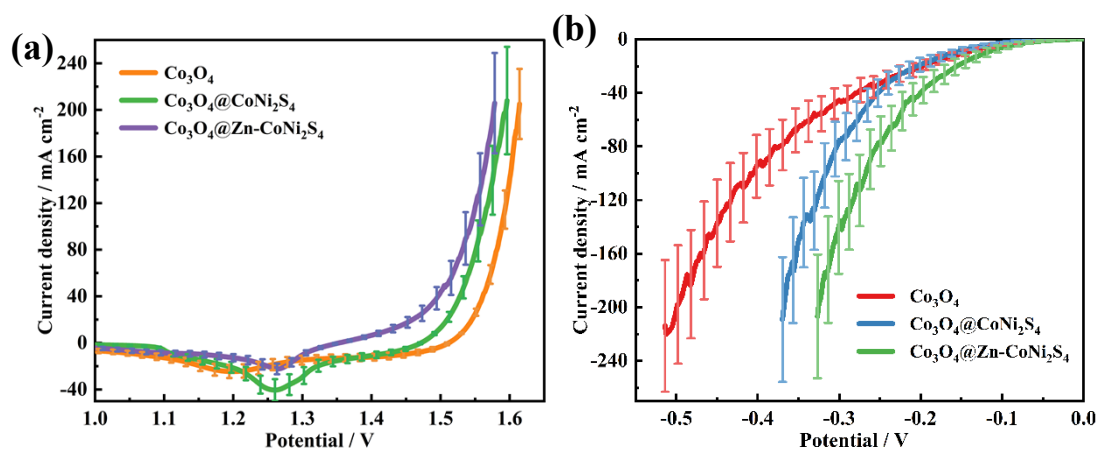

**Fig. S6** Overpotential comparison at a current density of  $10 \text{ mA cm}^{-2}$  for (a) the OER and (b) the HER of  $\text{Co}_3\text{O}_4@Zn\text{-CoNi}_2\text{S}_4/\text{NF}$ .

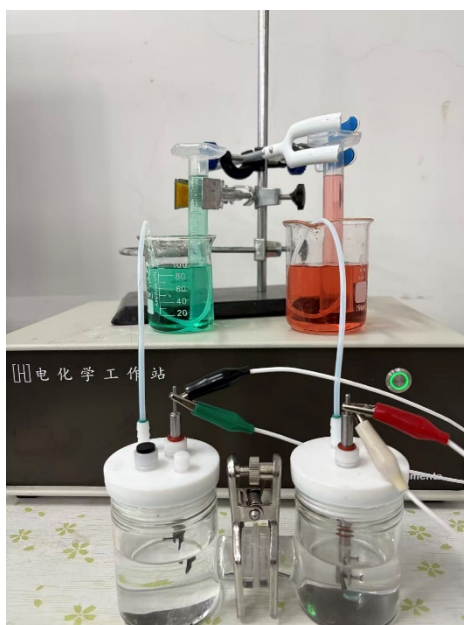

**Fig. S7** Schematic diagram of the faradaic efficiency measurement setup

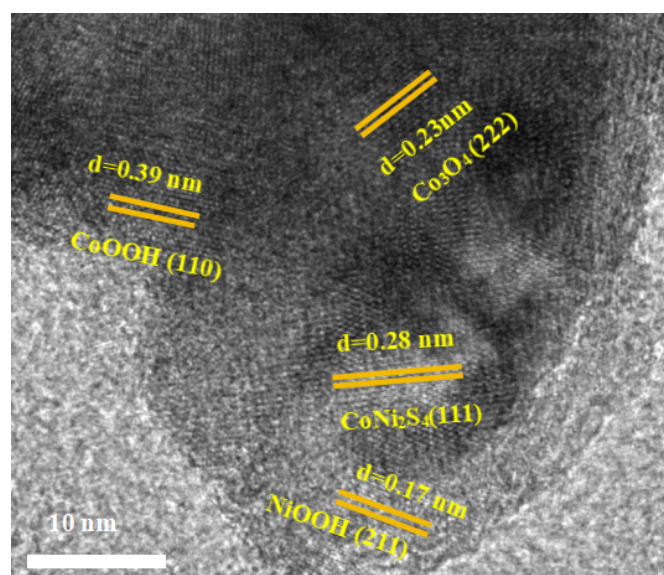

**Fig. S8** HRTEM image of  $\text{Co}_3\text{O}_4@\text{Zn-CoNi}_2\text{S}_4/\text{NF}$  after cycling.

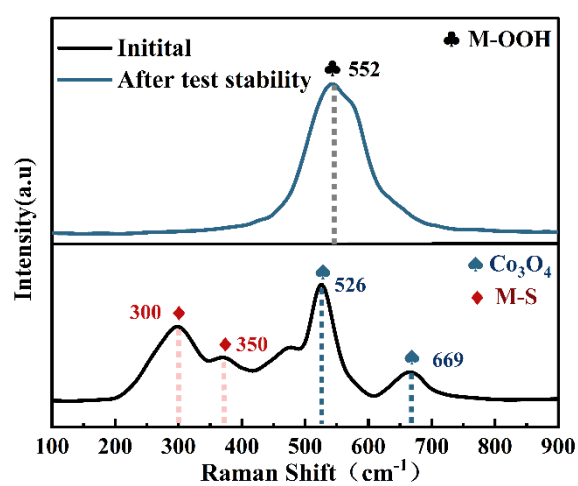

**Fig. S9** Raman spectra of  $\text{Co}_3\text{O}_4@\text{Zn-CoNi}_2\text{S}_4/\text{NF}$  before and after cycling.
